# Supplementary material
Source: Springer Nature journal article supplement (https://www.springermedizin.de/resource/supplementary/12885_2008_1566_MOESM5_ESM.pdf/9472338)
Supplement: MOESM5 [file 9472338]

1 MEKSLEMKGR LEIKEHHSVA ERANIGRKVF IESEREREKI QTEASGRVQS  
51 REKRECKLDM ALGYKEAREW ERLVEIATDR EHGSQPCLNS LKGILTMPTS  
101 GCSTVFLSL DSRNTVHRAR EDVIHMLKTE KTKPEVLEAH YGSAEPEKVL  
151 RVLHRDAILA QEKSIGEDVY EKPISELDRL EEKQKETYRR MLEQLLLAEK  
201 CHRRTVYELE NEKHKHTDYM NKSDDFTNLL EQERESLGNR SEATRPTVVG  
251 SANQSLWFKP RQRPKLQAKA QASAQLRLLK VPRPWEGPTE KAPASVKTDG  
301 LL
